# Supplementary material for: Paired CRISPR/Cas9 Nickases Mediate Efficient Site-Specific Integration of F9 into rDNA Locus of Mouse ESCs
Source: PubMed Central journal article supplement (PMC6213315; doi:10.3390/ijms19103035), 2018-10-05
Supplement: ijms-19-03035-s001.pdf [file ijms-19-03035-s001.pdf]

## Supplementary Information

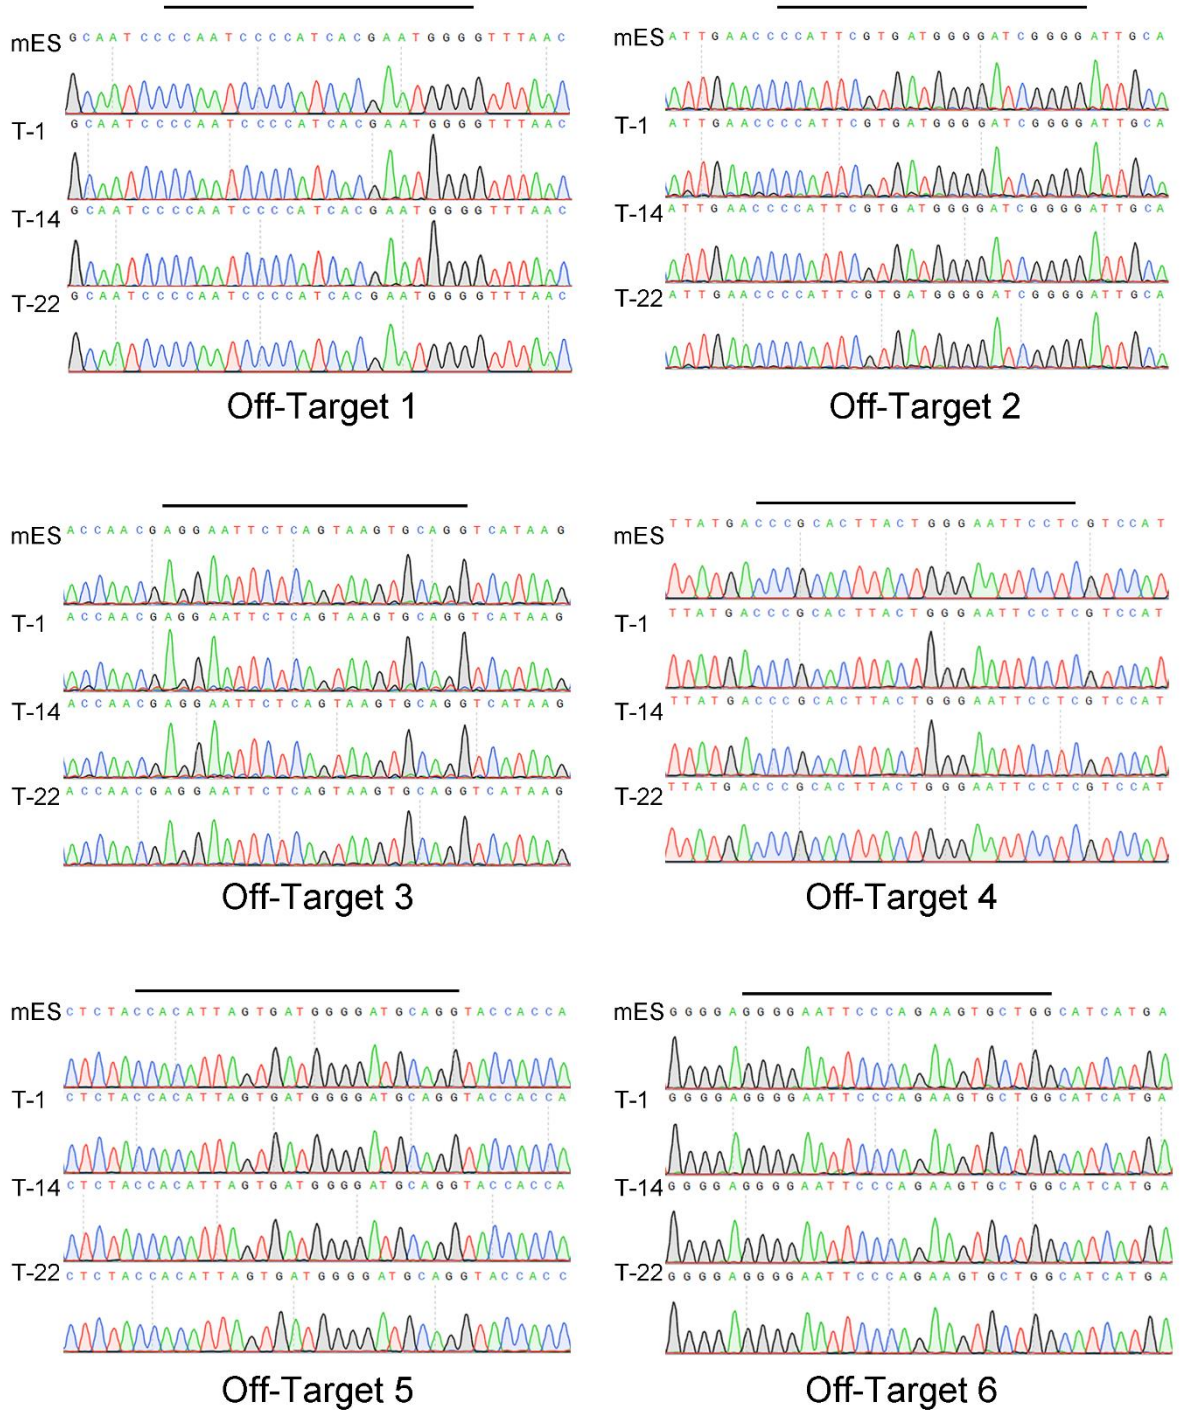

**Figure S1.** Sanger sequencing for 6 potential off-target sites of sg1 and sg6. Three targeted clones T-1, T-14, T-22 and the untargeted mESCs were analyzed. No indels were detected at the predicted sites. The lines above showed the potential sites.

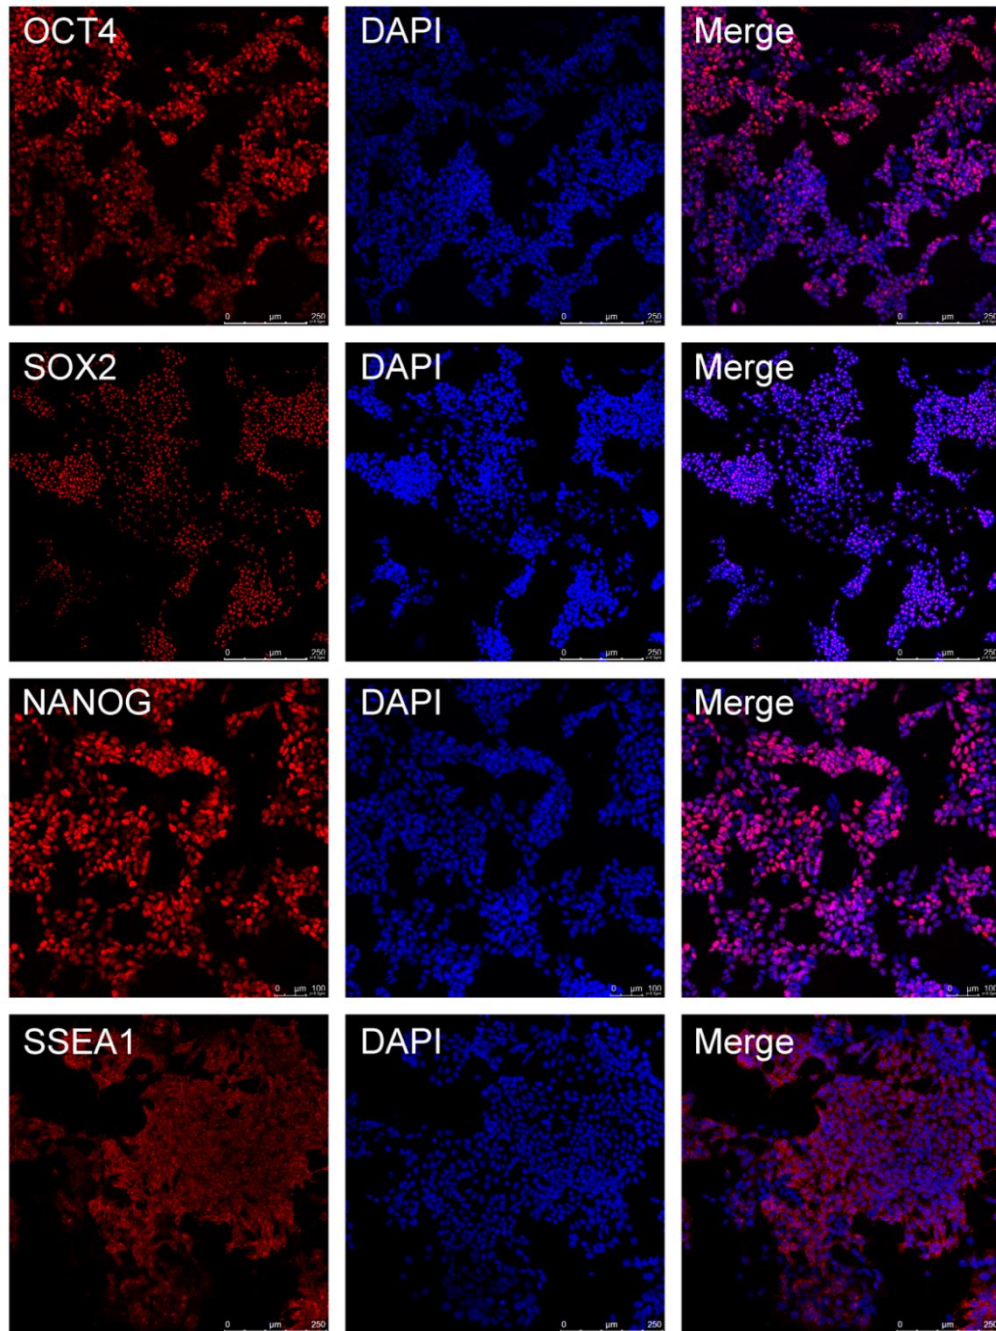

**Figure S2.** Immunofluorescence staining for targeted mESCs with pluripotent surface markers. Targeted clones expressed the pluripotent surface markers of mouse embryonic stem cells, including OCT4, SOX2, NANOG and SSEA1. Scale bar: 250  $\mu\text{m}$ .

**Table S1.** SgRNAs designed by Optimized CRISPR Design.

| Name | Sequences (PAM)                  |
|------|----------------------------------|
| Sg1  | GCCGATCCCCATCACGAATG <b>GGG</b>  |
| Sg2  | GCCCCGATCCCCATCACGAA <b>TGG</b>  |
| Sg3  | GCTGGGAATTCCTCGTTTCAT <b>GGG</b> |
| Sg4  | GTGGGAATTCCTCGTTTCATG <b>GGG</b> |
| Sg5  | GAGGAATTCCCAGTAAGTG <b>CGG</b>   |
| Sg6  | GAGGAATTCCCAGTAAGTGC <b>GGG</b>  |

**Table S2.** Primers and probe used in the study

| <b>Name</b> | <b>Forward (5'-3')</b>   | <b>Reverse (5'-3')</b>     |
|-------------|--------------------------|----------------------------|
| F1/R1       | GGGCAGGACAGCAAGGGGGAGGAT | CGGATGCGCGGGGGAGACCAG      |
| F2/R2       | GGTCGGCGTCCCCCAACTTCTTA  | GCAGGGGCGAGTCCTTTTGTATGAAT |
| Probe       | CCCGGAAACCTGGCCCTGTCTT   | TGGGGTACCTTCTGGGCATCCTTC   |
| mGAPDH      | TGTGTCCGTCGTGGATCTGA     | CCTGCTTCACCACCTTCTTGA      |
| hF9         | TCTGGAACCTGGACGAACCTT    | AGACATGTGGCTCGGTCAAC       |
| AFP         | GCCACCGAGGAGGAAGTG       | AGTCTTCTTGC GTGCCAGC       |
| ALB         | GGTGTGTTTCGCCGAGAAGCAC   | GCCGGCAGACTCATCGGC         |

**Table S3.** Antibodies used in the study

| <b>Antibody</b> | <b>Company</b> | <b>catalogue</b> | <b>Application</b> |
|-----------------|----------------|------------------|--------------------|
| ALB             | R & D          | MAB1455          | IF (1:200)         |
| CK19            | Abcam          | Ab52625          | IF (1:200)         |
| hFIX            | Sigma-Aldrich  | F2645            | IF (1:100)         |
| OCT4            | Abcam          | Ab19857          | IF (1:250)         |
| SOX2            | Abcam          | Ab97959          | IF (1:500)         |
| NANOG           | Abcam          | Ab80892          | IF (1:100)         |
| SSEA1           | Abcam          | Ab16285          | IF (1:100)         |
